# Supplementary figures and images for: An Integrated Analysis of miRNA and Gene Expression Changes in Response to an Obesogenic Diet to Explore the Impact of Transgenerational Supplementation with Omega 3 Fatty Acids
Source: MDPI journal article supplement (doi:10.3390/nu12123864), 2020-12-17

 Link

 Reversible link

 Reaction

 Metabolites

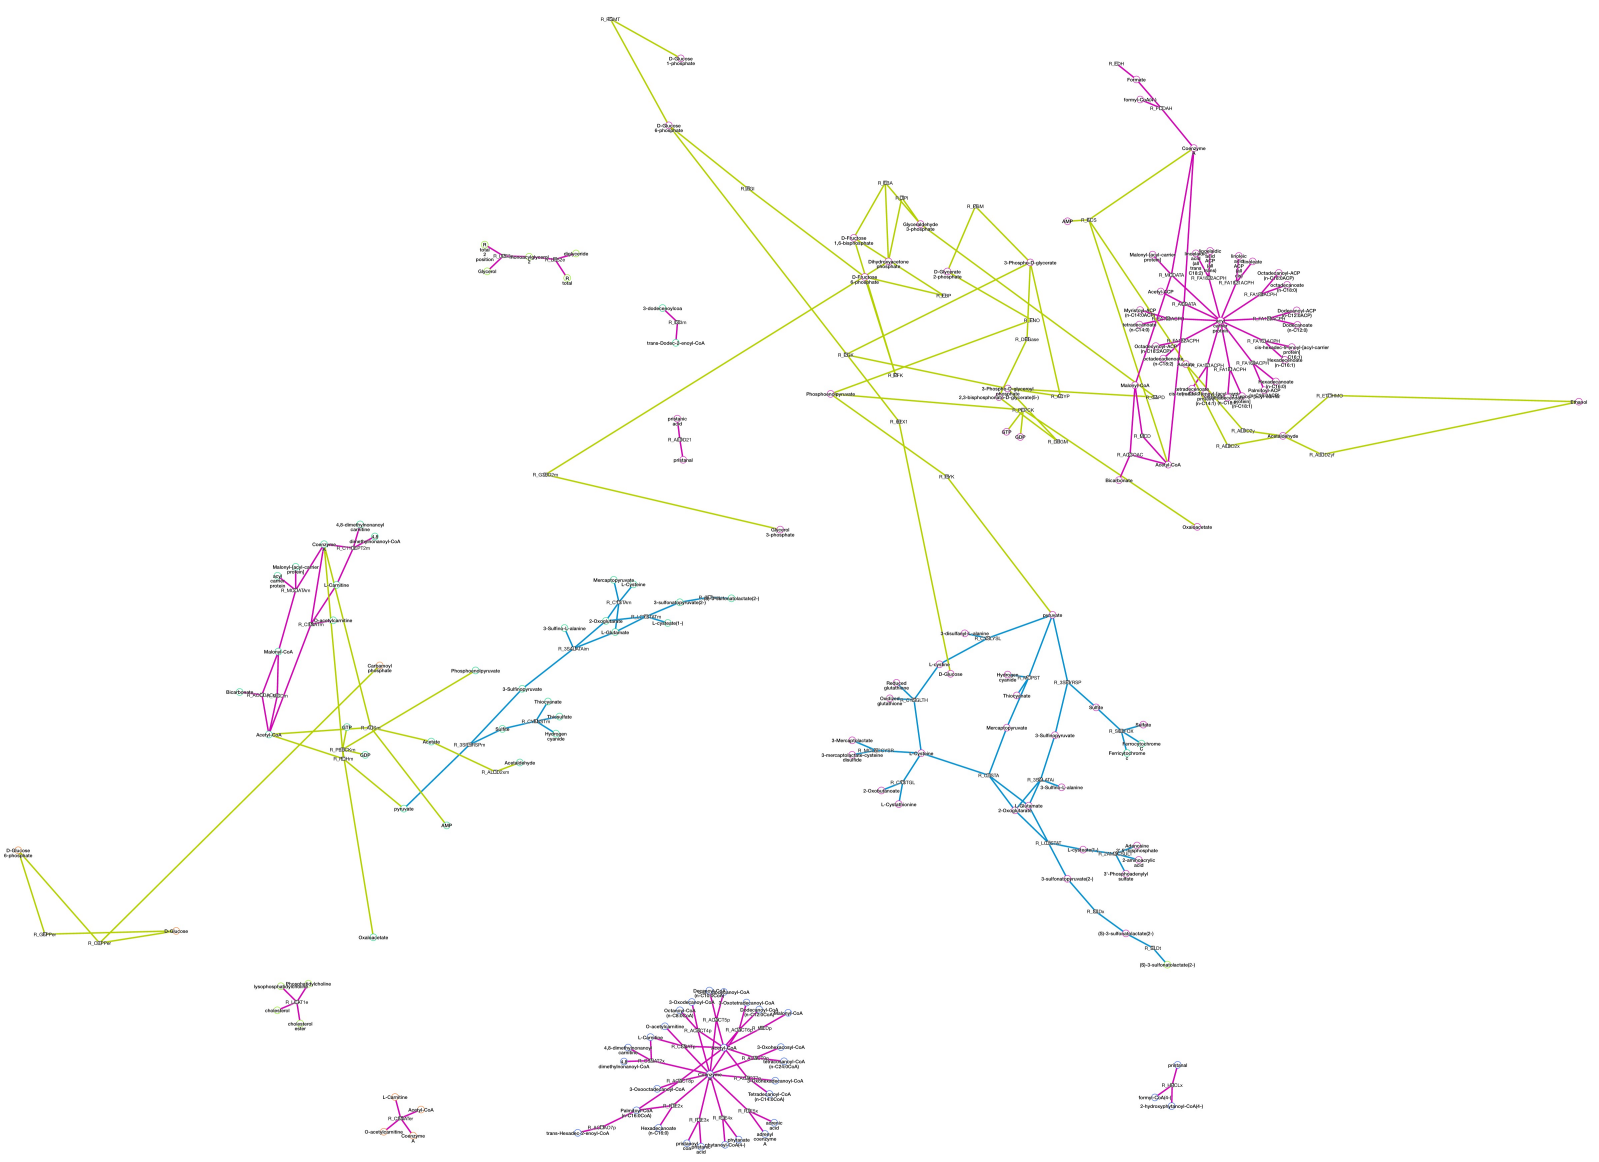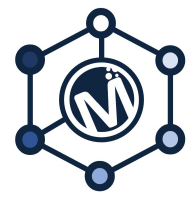

Supplement: s1 [file s1]

→

Link

↔

Reversible link

□

Reaction

○

Metabolites

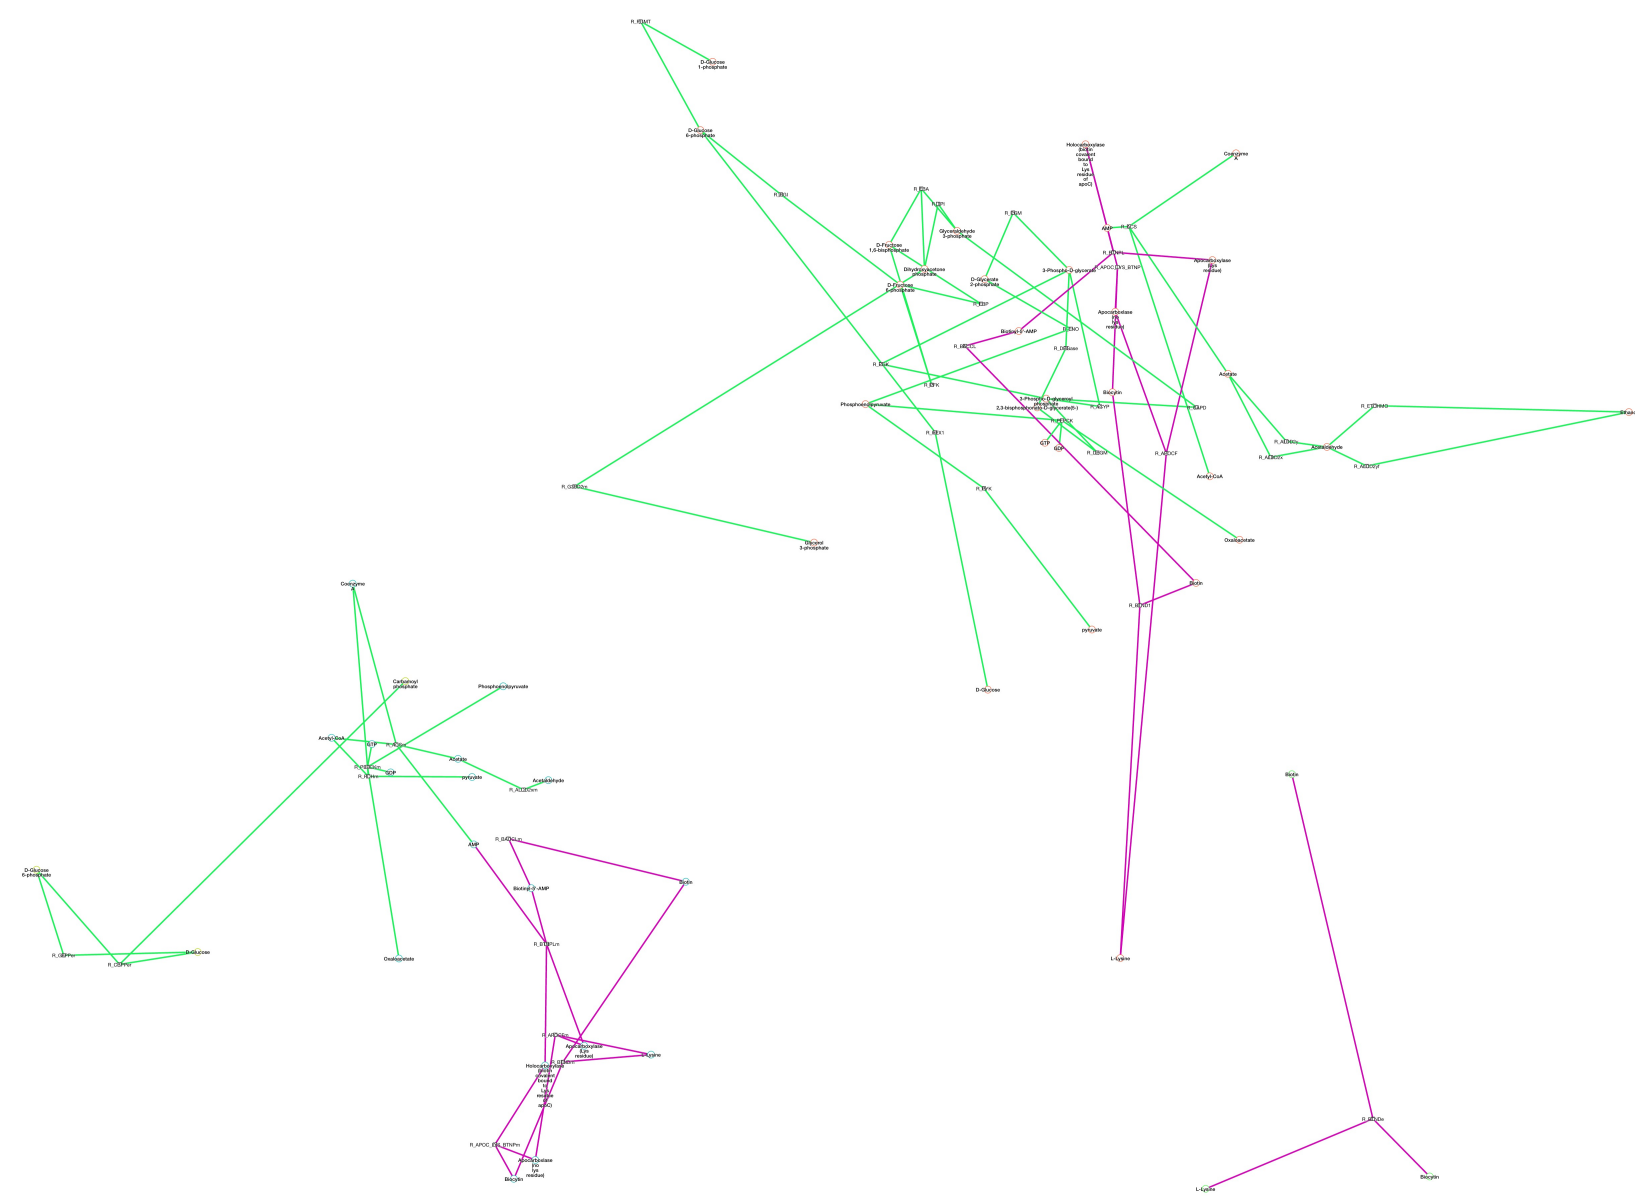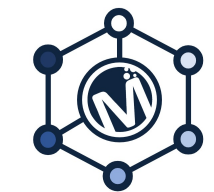

Supplement: s1 [file s1]
